# Supplementary material for: Estradiol Modulates Resting-State Connectivity in Perimenopausal Depression
Source: bioRxiv or medRxiv preprint supplement (doi:10.1101/2024.06.05.24306430), 2024-06-09
Supplement: Supplementary file [file media-1.pdf]

# Estradiol Modulates Resting-State Connectivity in Perimenopausal Depression

Megan Hynd, Kathryn Gibson, Melissa Walsh, Rachel Phillips, Julianna Prim, Tory Eisenlohr-Moul, Erin Walsh, Gabriel Dichter, and Crystal Schiller

## Supplemental Material

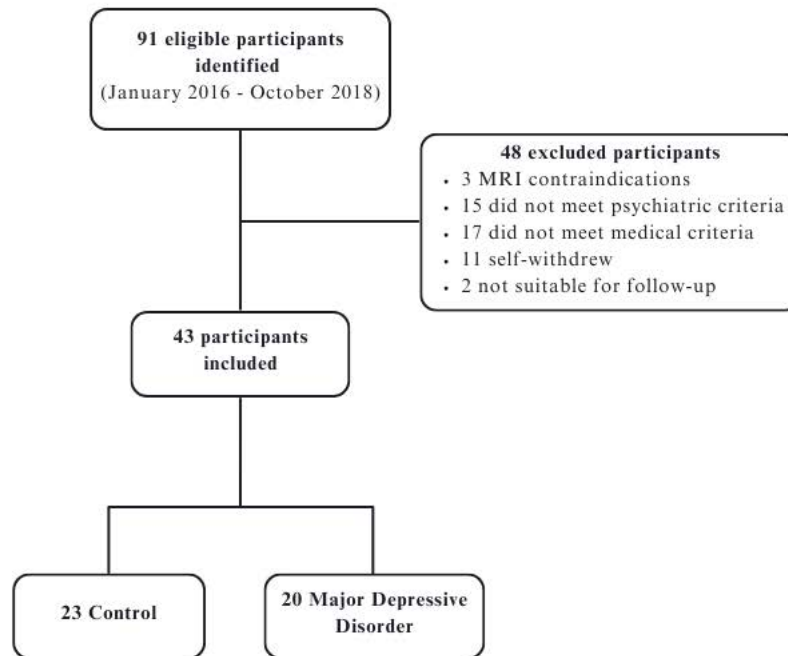

**Figure 4.** Study Consort Diagram.

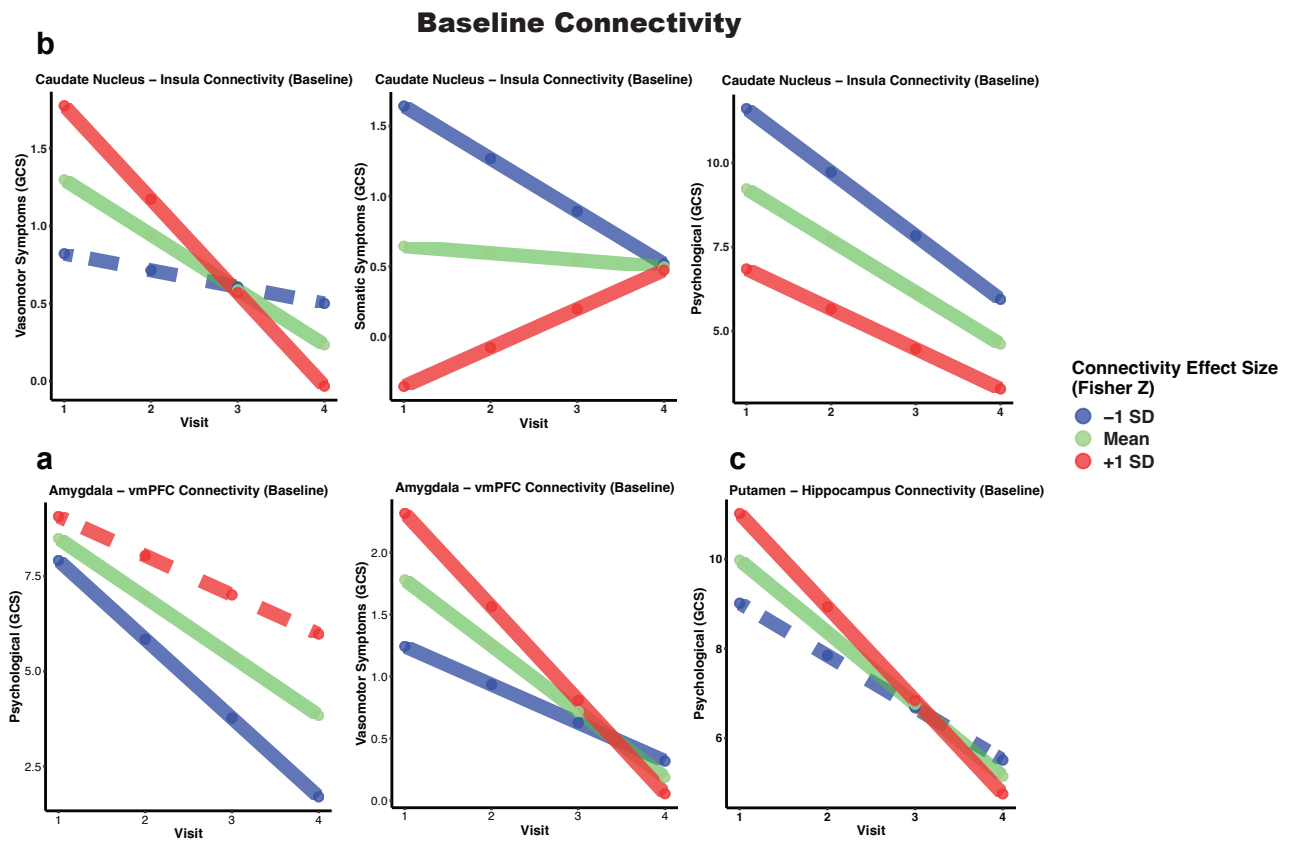

**Figure 5.** Trajectory Analysis of GCS Subscales Across Four Timepoints, Moderated by Baseline (a) Right Amygdala-Left vmPFC Connectivity, (b) Caudate Nucleus-Left Insula Connectivity, and (c) Right Putamen-Left Hippocampus Connectivity. Solid lines statistically significant.

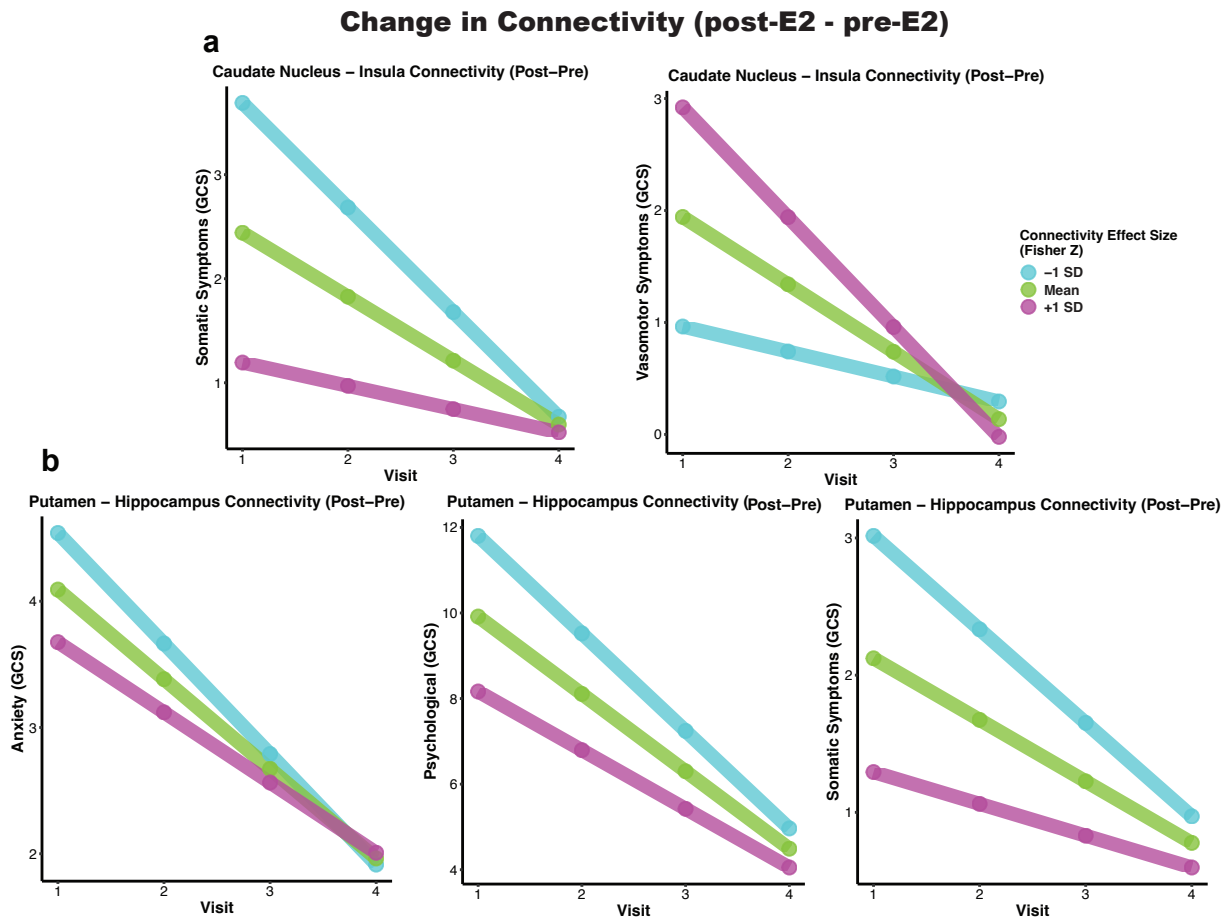

**Figure 6.** Predictive Analysis of Symptom Trajectory Over Treatment in GCS Subscales, Moderated by Change in (a) Right Caudate Nucleus-Left Insula Connectivity, (b) Right Putamen-Left Hippocampus Connectivity. Solid lines statistically significant.

| A.                    | ROI Seed | Target (x, y, z) | Brodman Area | Target Name                    | Side | Target Cluster Size | GLM p-FDR            | PO-MDD t-statistic (baseline) |                                            |
|-----------------------|----------|------------------|--------------|--------------------------------|------|---------------------|----------------------|-------------------------------|--------------------------------------------|
| <b>Right Amygdala</b> |          |                  |              |                                |      |                     |                      |                               |                                            |
|                       |          | -14 +58 +6       | -            | medial prefrontal cortex       | L    | 213                 | < 0.001***           | 5.34                          |                                            |
|                       |          | -10 +42 +12      | 32           | anterior cingulate cortex      | L    | 87                  | < 0.001***           | 5.31                          |                                            |
|                       |          | 8 -4 +56         | 6            | supplementary motor area       | R    | 51                  | 0.048*               | -4.54                         |                                            |
| B.                    | ROI Seed | Target (x, y, z) | Brodman Area | Target Name                    | Side | Target Cluster Size | GLM F-test statistic | GLM p-FDR                     | PO-MDD t-statistic (baseline vs follow-up) |
| <b>Right Amygdala</b> |          |                  |              |                                |      |                     |                      |                               |                                            |
|                       |          | 26               | 32           | ventromedial prefrontal cortex | L    | 67                  | 10.53                | 0.016*                        | 4.1                                        |
| <b>Right Caudate</b>  |          |                  |              |                                |      |                     |                      |                               |                                            |
|                       |          | -4               | -            | insula                         | L    | 59                  | 15.17                | 0.021*                        | -2.51                                      |
| <b>Right Putamen</b>  |          |                  |              |                                |      |                     |                      |                               |                                            |
|                       |          | -44              | -            | hippocampus                    | L    | 115                 | 21.14                | < 0.001***                    | 3.68                                       |

**Table 2.** A) Significant baseline group differences in Baseline connectivity significant results using the right amygdala as the seed region from a priori seeds. B) All significant group x time effects in connectivity results from a priori seeds, follow-up compared with baseline. GLM – general linear model. FDR – false discovery rate.

|                               |                   | Right Caudate Nucleus and Left Insula |                  |                    | Right Amygdala and Left vmPFC |                  |                  | Right Putamen and Left Hippocampus |                   |                   |
|-------------------------------|-------------------|---------------------------------------|------------------|--------------------|-------------------------------|------------------|------------------|------------------------------------|-------------------|-------------------|
|                               |                   | -1 SD                                 | Mean             | +1 SD              | -1 SD                         | Mean             | +1 SD            | -1 SD                              | Mean              | +1 SD             |
|                               |                   | $\beta(SE)$                           | $\beta(SE)$      | $\beta(SE)$        | $\beta(SE)$                   | $\beta(SE)$      | $\beta(SE)$      | $\beta(SE)$                        | $\beta(SE)$       | $\beta(SE)$       |
| <b>Symptom Measures</b>       |                   |                                       |                  |                    |                               |                  |                  |                                    |                   |                   |
| <b>Baseline Connectivity</b>  | MASQ-AD           |                                       |                  |                    | -0.8(0.4)                     | 1.7(0.6)         | <b>4.2(1.0)</b>  |                                    | -1.7(0.7)         | <b>-3.8(0.9)</b>  |
|                               | GCS Psychological | <b>-1.8(0.3)</b>                      | <b>-1.5(0.2)</b> | <b>-1.1(0.2)</b>   | <b>-1.6(0.3)</b>              | -1.1(0.4)        |                  |                                    | <b>-0.9(0.2)</b>  | <b>-1.4(0.3)</b>  |
|                               | GCS Depression    | <b>-1.0(0.1)</b>                      | <b>-0.7(0.1)</b> | <b>-0.5(0.1)</b>   | -0.6(0.2)                     |                  | 0.6(0.3)         |                                    | <b>-0.5(0.1)</b>  | <b>-0.9(0.2)</b>  |
|                               | GCS Somatic       | <b>-1.1(0.1)</b>                      | <b>-0.8(0.1)</b> | <b>-0.5(0.1)</b>   |                               |                  |                  |                                    |                   |                   |
|                               | GCS Vasomotor     |                                       | <b>-0.4(0.1)</b> | <b>-0.6(0.1)</b>   | <b>-0.2(0.1)</b>              | <b>-0.5(0.1)</b> | <b>-0.7(0.2)</b> |                                    |                   |                   |
|                               | GCS Anxiety       |                                       |                  |                    |                               |                  |                  |                                    |                   |                   |
|                               |                   | MASQ-AD                               |                  | <b>-1.3(0.4)</b>   | <b>-3.1(0.4)</b>              | <b>-6.9(0.8)</b> | <b>-3.8(0.4)</b> | -0.7(0.4)                          |                   |                   |
| <b>Change in Connectivity</b> | GCS Psychological |                                       |                  |                    |                               |                  |                  | <b>-2.1(0.2)</b>                   | <b>-1.6(0.2)</b>  | <b>-1.2(0.3)</b>  |
|                               | GCS Depression    |                                       |                  |                    | -1.8(0.2)                     | <b>-1.2(0.2)</b> | -0.5(0.2)        | <b>-1.3(0.1)</b>                   | <b>-1.0(0.1)</b>  | <b>-0.7(0.1)</b>  |
|                               | GCS Somatic       | <b>-0.1(0.1)</b>                      | -0.6(0.1)        | -0.2(0.03)         |                               |                  |                  | <b>-0.7(0.1)</b>                   | <b>-0.4(0.04)</b> | <b>-0.2(0.04)</b> |
|                               | GCS Vasomotor     | <b>-0.2(0.1)</b>                      | <b>-0.6(0.1)</b> | <b>-0.10(0.10)</b> |                               |                  |                  |                                    |                   |                   |
|                               | GCS Anxiety       |                                       |                  |                    |                               |                  |                  | <b>-0.9(0.1)</b>                   | <b>-0.7(0.03)</b> | <b>-0.6(0.1)</b>  |
|                               |                   | MASQ-AD                               |                  |                    |                               |                  |                  |                                    |                   |                   |
|                               |                   | GCS Psychological                     |                  |                    |                               |                  |                  |                                    |                   |                   |

**Table 3.** Simple Slope Analysis Results. All data points significant at uncorrected  $p < 0.05$ ; bolded data points are significant at uncorrected  $p < 0.001$ .
